# Supplementary material
Source: PubMed Central journal article supplement (PMC4018166)

***Supporting Information to Accompany:***

**Copper-free Click for PET: Rapid 1,3-Dipolar  
Cycloadditions with a Fluorine-18 Cyclooctyne**

*Richard D. Carpenter,<sup>†</sup> Sven H. Hausner,<sup>†</sup> Julie L. Sutcliffe<sup>†,‡,£,\*</sup>*

<sup>†</sup>Department of Biomedical Engineering, <sup>‡</sup>Division of Hematology/Oncology, Department of Internal Medicine, and <sup>£</sup>Center for Molecular and Genomic Imaging, University of California, Davis, California 95616

*jlsutcliffe@ucdavis.edu*

***Experimental Section Table of Contents***

|                                                            |     |
|------------------------------------------------------------|-----|
| Supporting Information Scheme 1 .....                      | S1  |
| Supporting Information Table 1 .....                       | S2  |
| General Procedures .....                                   | S3  |
| Experimental Protocols .....                               | S5  |
| Analytical Data (Supporting Information Figures 1-12)..... | S10 |

**Supporting Information Scheme 1. Synthesis of the ADIBO amine (5) precursor.**

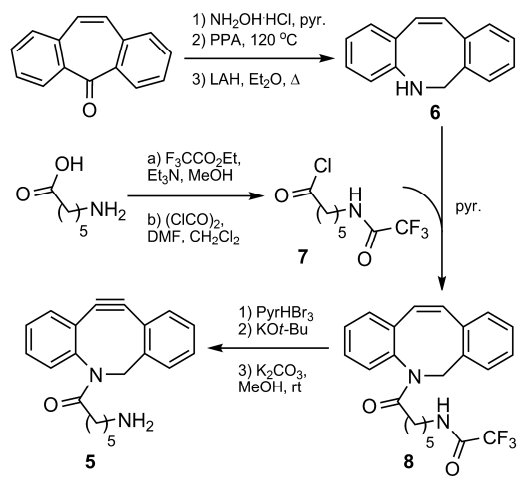

**Supporting Information Table 1.** Stability of [<sup>18</sup>F]-**4** and [<sup>18</sup>F]-**12** in rat serum at various time points.<sup>a</sup>

| <b>Compound</b>               | Fraction of intact radiolabeled compound |        |         |
|-------------------------------|------------------------------------------|--------|---------|
|                               | 30 min                                   | 60 min | 120 min |
| [ <sup>18</sup> F]- <b>4</b>  | >99%                                     | 98.3%  | 98.2%   |
| [ <sup>18</sup> F]- <b>12</b> | >99%                                     | >99%   | 96.8%   |

<sup>a</sup>The fraction of intact radiolabeled compound was determined by analytical radio reversed-phase HPLC.

## General Procedures

**Reagents and Solvents:** Reagents and solvents were purchased from Aldrich, Acros, TCI America, Novabiochem, Alfa Aesar, and VWR and used without further purification with the exception of the following. Tetrahydrofuran (THF) and *N,N*-dimethylformamide (DMF) were passed through a column of alumina and stored over activated 3 Å molecular sieves. Triethylamine and *N,N*-diisopropylethylamine (DIEA) were distilled from sodium hydride. Methanol and pyridine were dried over 3 Å molecular sieves. All dry organic solvents used for radiochemical syntheses were used as purchased (AcroSeal; Acros) and stored over activated 3 Å molecular sieves. [<sup>18</sup>F]Fluoride was produced from the <sup>18</sup>O(p,n)<sup>18</sup>F nuclear reaction on [<sup>18</sup>O]H<sub>2</sub>O purchased from Medical Isotopes, Inc. using a Siemens CTI RDS 111 negative ion cyclotron.

**Chromatography and Purification:** Thin layer chromatography (TLC) used glass plates coated with silica gel 60 F254 (UV indicator), developed in a chamber, and visualized under ultraviolet light ( $\lambda_{ex} = 254$  nm) as well as by treatment with cerium molybdate solution prepared from 40 g of ammonium pentamolybdate + 1.6 g of cerium(IV) sulfate + 800 mL diluted sulfuric acid (1:9, with water, v/v). Silica gel was purchased from Silicycle (SiliaFlash® P60, 40-63  $\mu$ m, 60Å). Radiochemical solid-phase extraction (SPE) was done with C<sub>18</sub> SepPak Plus cartridges (Waters) that were pre-conditioned with denatured ethanol (10 mL), water (10 mL), and air (3 x 10 mL). Reversed-phase HPLC was used to purify and analyze the products; solvent A: 0.05% trifluoroacetic acid (TFA) in water (v/v); solvent B: acetonitrile. HPLC systems were equipped with both UV absorbance detector (UV, 220 nm) and a radioactivity detector

(photomultiplier tube; PMT) connected in series, which accounts for the slight difference between detected retention times for corresponding  $^{18}\text{F}$ - and  $^{19}\text{F}$ -compounds. Analytical HPLC: Phenomenex Jupiter 4  $\mu\text{m}$  Proteo 90 Å column (250  $\times$  4.6 mm, 4  $\mu\text{m}$ ), solvent B isocratic 9% for 2 min, then linear gradient to 81% over 30 min, flow rate 1.5 mL/min. Semi-preparative HPLC: Phenomenex Jupiter 10  $\mu\text{m}$  Proteo 90 Å (250  $\times$  10 mm, 10  $\mu\text{m}$ ), solvent B isocratic 9% for 2 min, then linear gradient to 81% over 30 min, flow rate 3 mL/min.  $^1\text{H}$  NMR spectra were obtained using a Bruker Instrument (500 MHz) and recorded in chloroform-*d* with the solvent signal used as a reference (7.26 ppm). LC-MS was done using a Waters Alliance instrument equipped with a Waters Nova-Pak  $\text{C}_{18}$  column (3.9  $\times$  150 mm) using 0.1% TFA in water (v/v; solvent A) and 0.1% TFA in acetonitrile (v/v; solvent B) with a linear gradient over 25 min from 5% solvent B to 80%.

**Animal Handling:** All animals were handled in accordance with a protocol approved by the University of California, Davis, Animal Use and Care Committee.

## Experimental Protocols

**Synthesis of ADIBO-[<sup>19</sup>F]Fluorobenzamide ([<sup>19</sup>F]-4).** ADIBO-amine **5** (4 mg, 12.3 μmol) was dissolved in anhydrous DMF (500 μL) and *N,N*-diisopropylethylamine (DIEA; 1 drop) was added. [<sup>19</sup>F]SFB (5 mg, 21.1 μmol) was then added, and the reaction was allowed to proceed for 75 min at room temperature. The reaction mixture was diluted with 1:1 acetonitrile:0.1% TFA in water (v/v; 2 mL) and purified *via* reversed-phase semi-preparative HPLC. Pooled fractions were freeze dried to afford ADIBO-[<sup>19</sup>F]fluorobenzamide [<sup>19</sup>F]-**4** as a colorless fluffy solid (2.1 mg, 39% yield). <sup>1</sup>H NMR (CDCl<sub>3</sub>, 500 MHz, 25 °C) δ 7.83-6.44 (m, 12H), 5.16 (d, *J* = 12 Hz, 1H), 3.69-0.9 (m, 11H); ESI-MS (*m/z*) 441.11 (M + H)<sup>+</sup> (Supporting Information Figure 1). The chemical purity was determined to be 99% by HPLC (Supporting Information Figure 2), retention times of [<sup>19</sup>F]-**4** were 28.7, 29.2, and 29.5 min (Supporting Information Figure 4).

**Synthesis of *N*-Succinimidyl 4-[<sup>18</sup>F]Fluorobenzoate ([<sup>18</sup>F]SFB) ([<sup>18</sup>F]-10).**<sup>1</sup> 4-[<sup>18</sup>F]Fluorobenzoic acid ([<sup>18</sup>F]FBA), was prepared according to our previously described protocol using the aryltrimethylammonium precursor **9**.<sup>1</sup> [<sup>18</sup>F]SFB ([<sup>18</sup>F]-**10**) was prepared with slight modifications to Zalutsky's protocol.<sup>2</sup> Briefly, [<sup>18</sup>F]FBA (686.0 MBq – 37.11 GBq) in anhydrous acetonitrile (500 μL) was added to a 5-mL screw-cap conical vial containing trimethylammonium hydroxide in water (45% wt/v; 10 μL). The solution was azeotropically dried (3 x 1 mL of acetonitrile) at 100 °C using a gentle stream of helium. After the final evaporation, *O*-(*N*-succinimidyl)-1,1,3,3-tetramethyluronium

---

<sup>1</sup> Hausner, S. H.; Marik, J.; Gagnon, M. K.; Sutcliffe, J. L. *In Vivo* Positron Emission Tomography (PET) Imaging with an α<sub>v</sub>β<sub>6</sub> Specific Peptide Radiolabeled Using <sup>18</sup>F-"click" Chemistry: Evaluation and Comparison with the Corresponding 4-[<sup>18</sup>F]fluorobenzoyl- and 2-[<sup>18</sup>F]fluoropropionyl Peptides. *J. Med. Chem.* **2008**, *51*, 5901-5904.

<sup>2</sup> Vaidyanathan, G.; Zalutsky, M. R. Synthesis of *N*-succinimidyl 4-[<sup>18</sup>F]fluorobenzoate, an Agent for Labeling Proteins and Peptides with <sup>18</sup>F. *Nat. Protoc.* **2006**, *1*, 1655-1661.

tetrafluoroborate (TSTU; 12 mg) in anhydrous acetonitrile (1 mL) was added *via* syringe, and the reaction was heated at 100 °C for 5 min in the sealed vial. The reaction mixture was then aspirated into a syringe containing water (9 mL) and acetic acid (150 µL) and shaken. Crude [<sup>18</sup>F]-**10** was then trapped onto a C<sub>18</sub> SepPak Plus, washed (10 mL of 10% aqueous acetonitrile), dried (3 x 10 mL of air), and eluted with anhydrous acetonitrile (3 mL) and air (5 mL) into a clean 5-mL screw-cap conical vial. The solution was dried azeotropically at 100 °C using a gentle stream of helium, followed by evaporation of fresh acetonitrile twice (2 x 1 mL) to afford dry [<sup>18</sup>F]SFB ([<sup>18</sup>F]-**10**; 284.2 MBq – 6.586 GBq; 43 + 22% d.c. RCY; synthesis time of 73 + 27 min; *n* = 4). The radiochemical purity was 80.4 + 20.3% as determined by analytical radio HPLC. The radioactive reversed-phase HPLC trace of [<sup>18</sup>F]-**10** correlated with the UV trace of [<sup>19</sup>F]-**10**, retention time was 20.3 min.

**Synthesis of ADIBO-[<sup>18</sup>F]Fluorobenzamide ([<sup>18</sup>F]-**4**).** ADIBO-amine **5** (2.5 mg) in DIEA (10 µL) and anhydrous DMF (300 µL) was added to dried [<sup>18</sup>F]SFB ([<sup>18</sup>F]-**10**) (284.6 MBq – 6.586 GBq). The reaction was heated to 37 °C for 30 min with stirring. The reaction mixture was aspirated into a 10-mL syringe containing 0.2 M NaOH (5 mL), trapped onto a C<sub>18</sub> SepPak Plus cartridge, washed with water (10 mL), dried with air (3 x 10 mL) and eluted with acetonitrile (3 mL) and air (5 mL). The solution was heated at 60 °C and the acetonitrile was evaporated using a gentle stream of helium to afford crude ADIBO-[<sup>18</sup>F]fluorobenzamide ([<sup>18</sup>F]-**4**; 74.0 MBq – 3.615 GBq; 64 + 15% d.c. RCY with a synthesis time of 89 + 24 min). The crude radiochemical purity was 80.4 + 3.3% as determined by analytical radio reversed-phase HPLC. HPLC trace of

[<sup>18</sup>F]-4 correlated with the UV trace of [<sup>19</sup>F]-4, retention times of [<sup>18</sup>F]-4 were 28.9, 29.3, and 29.7 min (Supporting Information Figures 3 and 4).

**General Procedure for Fluorine-19 Copper-free Click Reactions: *N*-(6-(1-Benzyl-1*H*-dibenzo[*b,f*][1,2,3]triazolo[4,5-*d*]azocin-8(9*H*)-yl)-6-oxohexyl)-4-[<sup>19</sup>F]fluorobenzamide ([<sup>19</sup>F]-11).** ADIBO-[<sup>19</sup>F]fluorobenzamide ([<sup>19</sup>F]-4; 1 mg, 23 μmol) was dissolved in DMF (150 μL) and treated with an alkyl azide (benzyl azide; 10 mg, 75 μmol). The reaction was warmed to 40 °C for 1 h, diluted with 1:1 acetonitrile:0.1% TFA in water (v/v; 2 mL) and purified *via* semi-preparative reversed-phase HPLC. Pooled fractions were freeze dried to afford [<sup>19</sup>F]-11 as a light brown solid (0.5 mg; 39% yield): ESI-MS (*m/z*) 574.26 (M + H)<sup>+</sup> (Supporting Information Figure 5). The chemical purity was determined to be >95% by reversed-phase HPLC for the mixture of triazole regioisomers (Supporting Information Figure 6), retention times of [<sup>19</sup>F]-11 were 27.5 and 27.7 min (Supporting Information Figure 10).

**Synthesis of 32-(8-(6-(4-[<sup>19</sup>F]Fluorobenzamido)hexanoyl)-8,9-dihydro-1*H*-dibenzo[*b,f*][1,2,3]triazolo-[4,5-*d*]azocin-1-yl)-5-oxo-3,9,12,15,18,21,24,27,30-nonaoxa-6-azadotriacontan-1-oic acid ([<sup>19</sup>F]-12).** Following the General Procedure for Fluorine-19 Copper-free Click Reactions using 32-azido-5-oxo-3,9,12,15,18,21,24,27,30-nonaoxa-6-azadotriacontan-1-oic acid (15 mg, 27 μmol), afforded [<sup>19</sup>F]-12 as a reddish brown solid (1.4 mg; 61% yield): ESI-MS (*m/z*) 995.24 (M + H)<sup>+</sup>, 1012.81 (M + H<sub>3</sub>O)<sup>+</sup>, 498.38 [(M + 2H)<sup>2+</sup>] / 2 (Supporting Information Figure 7). The chemical purity was determined to be >99% by reversed-phase HPLC for the mixture of triazole regioisomers (Supporting Information Figure 8), retention times of [<sup>19</sup>F]-12 were 20.7 and 21.0 min (Supporting Information Figure 12).



**General Procedure for Fluorine-18 Copper-free Click Reactions: *N*-(6-(1-Benzyl-1*H*-dibenzo[*b,f*][1,2,3]triazolo[4,5-*d*]azocin-8(9*H*)-yl)-6-oxohexyl)-4-[<sup>18</sup>F]fluorobenzamide ([<sup>18</sup>F]-11).** Dried crude ADIBO-[<sup>18</sup>F]fluorobenzamide [<sup>18</sup>F]-4 (54.4 – 232.7 MBq), in a 5-mL screw-cap conical vial was reacted with an azide (benzyl azide; 8-25 mg, 60-188 μmol) in anhydrous DMF (150 μL). The reaction proceeded at 37 °C and an aliquot was taken at 30 min and immediately analyzed by analytical radio HPLC (74 + 4.8% radiochemical conversion; *n* = 3). Additional samples were measured at 1 h (75 + 1.8% radiochemical conversion) and 4 h (78 + 2.4% radiochemical conversion). The crude radiochemical purity was 50.6%, while purified [<sup>18</sup>F]-11 was >99% radiochemically pure as determined by analytical radio reversed-phase HPLC for the mixture of triazole regioisomers (Supporting Information Figure 9). The radioactive reversed-phase HPLC trace of [<sup>18</sup>F]-11 correlated with the UV trace of [<sup>19</sup>F]-11, retention times of [<sup>18</sup>F]-11 were 27.6 and 27.8 min (Supporting Information Figures 9 and 10).

**Synthesis of 32-(8-(6-(4-[<sup>18</sup>F]Fluorobenzamido)hexanoyl)-8,9-dihydro-1*H*-dibenzo[*b,f*][1,2,3]triazolo-[4,5-*d*]azocin-1-yl)-5-oxo-3,9,12,15,18,21,24,27,30-nonaoxa-6-azadotriacontan-1-oic acid ([<sup>18</sup>F]-12).** Following the General Procedure for Fluorine-18 Copper-free Click Reactions, [<sup>18</sup>F]-4 (54.4 – 232.7 MBq) was reacted with 32-azido-5-oxo-3,9,12,15,18,21,24,27,30-nonaoxa-6-azadotriacontan-1-oic acid (3-15 mg, 5-27 μmol) as the azide source, and aliquots were taken at the 2 h and 6 h time points. Radiochemical conversion was 64 + 8.5% and crude radiochemical purity was 48 + 7.4% for the mixture of triazole regioisomers (*n* = 3 at each time point) as determined by analytical radio reversed-phase HPLC. Purified [<sup>18</sup>F]-12 was >99% radiochemically pure as determined by analytical radio reversed-phase HPLC for the

mixture of triazole regioisomers (Supporting Information Figure 11). The radioactive trace of [<sup>18</sup>F]-**12** correlated with the UV trace of [<sup>19</sup>F]-**12**, retention times of [<sup>18</sup>F]-**12** were 20.9 and 21.2 min (Supporting Information Figures 11 and 12).

**Serum Stability Studies.** The radiolabeled compound ([<sup>18</sup>F]-**4** or [<sup>18</sup>F]-**12**) was purified by reversed-phase HPLC. Fractions containing pure product were pooled, diluted with water (15 mL), trapped onto a C<sub>18</sub> SepPak Plus cartridge, washed with water (5 mL), dried with air (15 mL) and eluted with absolute ethanol (1.5 mL) containing 5 µL glacial acetic acid. The solvent was evaporated at 40-50 °C using a gentle stream of nitrogen gas and the radiolabeled compound was formulated in PBS/saline (containing 10% v/v absolute ethanol for [<sup>18</sup>F]-**4**) at pH 7.0-7.4. Radiochemical purities of purified [<sup>18</sup>F]-**4** and [<sup>18</sup>F]-**12** were confirmed by analytical radio reversed-phase HPLC. Serum was obtained from male Sprague Dawley rats (Charles River Laboratories). Following euthanasia blood was collected, allowed to clot for 1 h at room temperature, and centrifuged (2300×g, 10 min). Serum (1 mL) was collected and combined with an aliquot of the formulated radiolabeled compound ([<sup>18</sup>F]-**4** or [<sup>18</sup>F]-**12**, 25 µL; approx. 2 MBq) in an Eppendorf tube.<sup>3</sup> The tube was gently shaken and kept at 37 °C. Aliquots (100 µL) were withdrawn at selected time points (30, 60 and 120 min), mixed with absolute ethanol (4 °C, 500 µL) and centrifuged (2300×g, 2.5 min) to precipitate serum proteins. The percentage of intact radiolabeled compound at each time point was determined by analytical radio reversed-phase HPLC of supernatant samples.

<sup>3</sup> Gottumukkala, V.; Heinrich, T. K.; Baker, A.; Dunning, P.; Fahey, F. H.; Treves, S. T.; Packard, A. B. Biodistribution and stability studies of [<sup>18</sup>F]fluoroethylrhodamine B, a potential PET myocardial perfusion agent. *Nucl. Med. Biol.* **2010**, *37*, 365-370.

# Supporting Information Figure 1. LC/MS traces of [<sup>19</sup>F]-4.

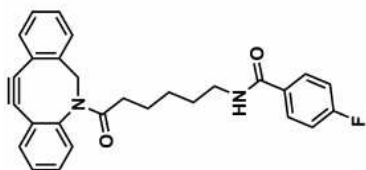

Chemical Formula: C<sub>28</sub>H<sub>25</sub>FN<sub>2</sub>O<sub>2</sub>  
Exact Mass: 440.1900

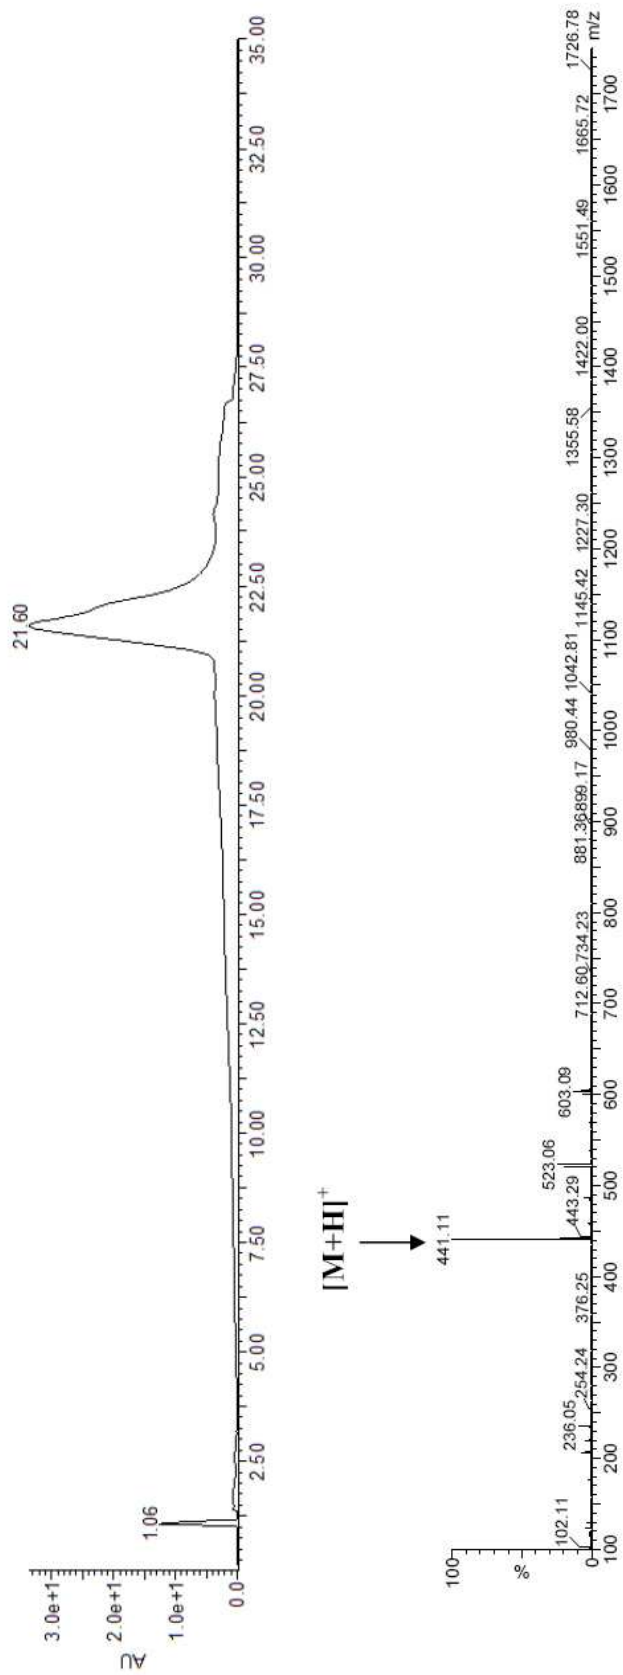

Supporting Information Figure 2. Analytical HPLC trace of [<sup>19</sup>F]-4 (λ = 220 nm).

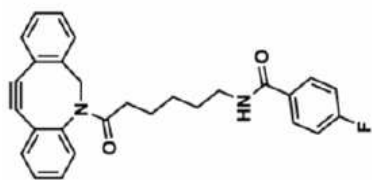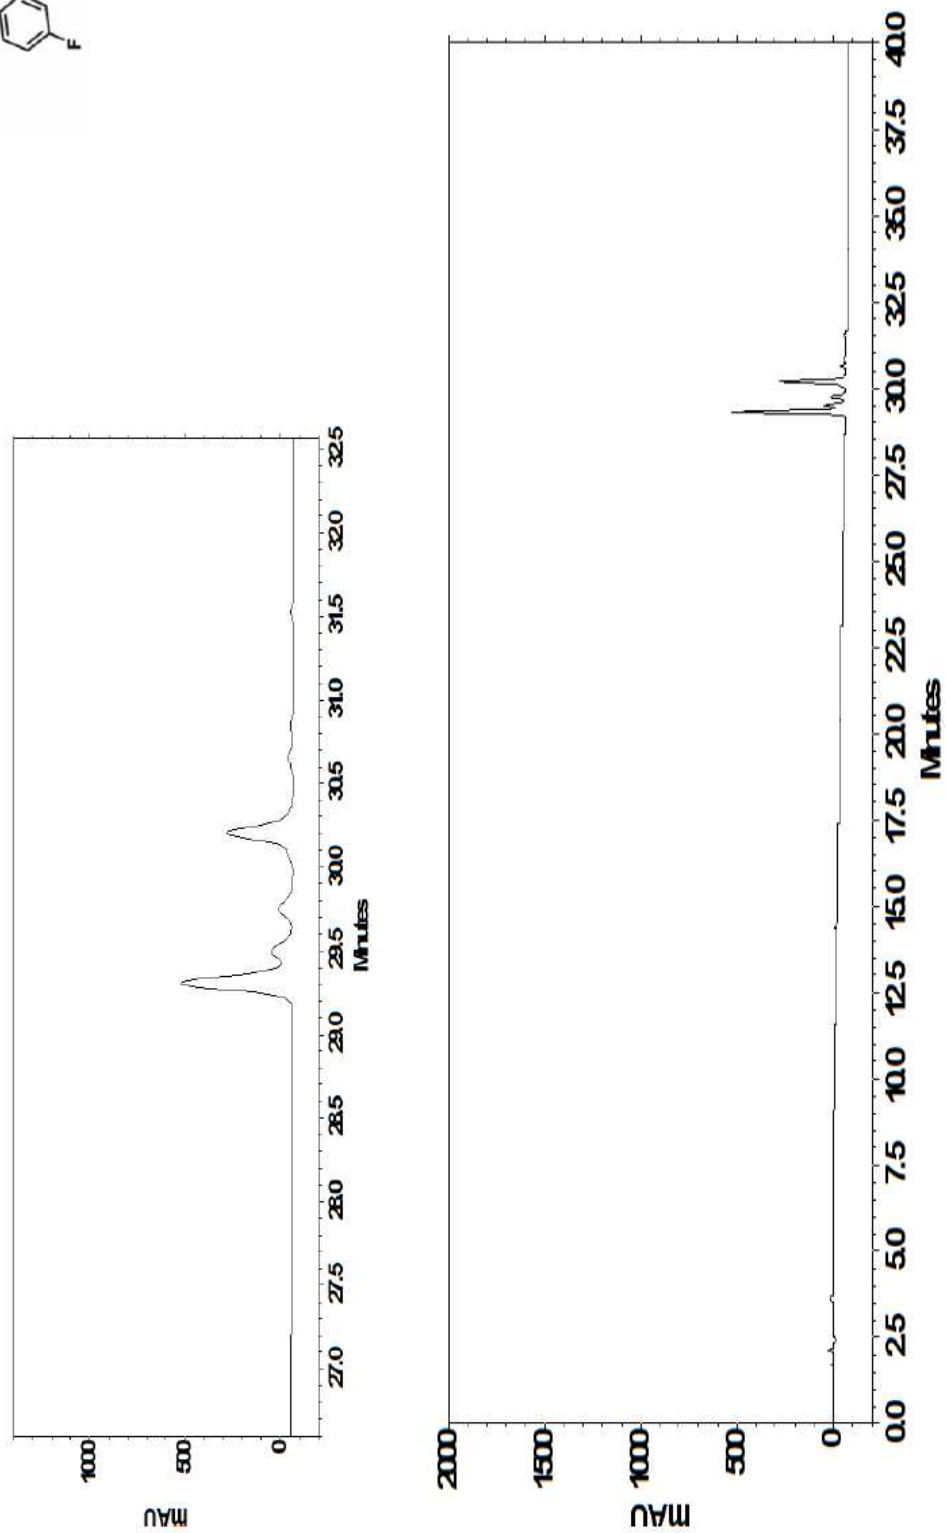

**Supporting Information Figure 3.** Analytical HPLC UV ( $\lambda = 220$  nm) trace (black) overlaid with the radio HPLC trace (red) of purified [ $^{18}\text{F}$ ]-4 (y-axis: arbitrary scale).

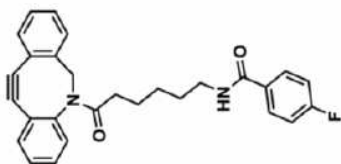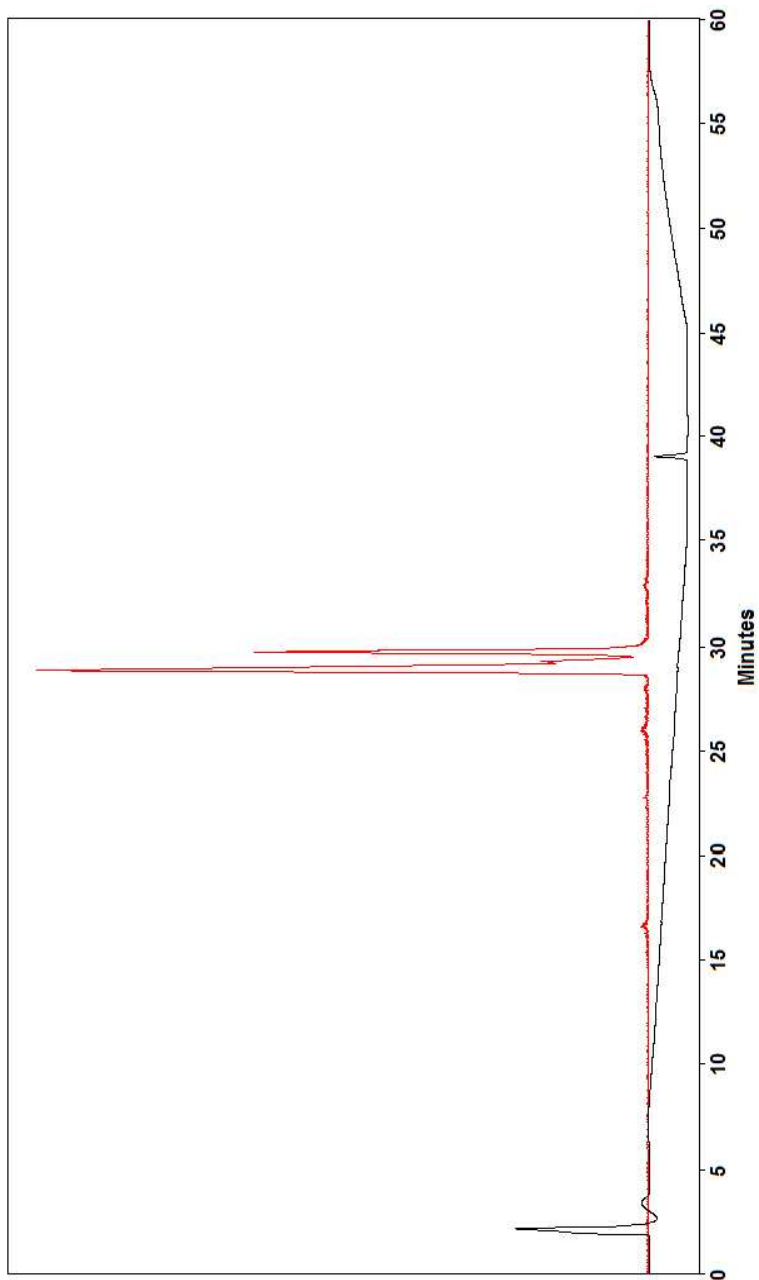

**Supporting Information Figure 4.** Analytical HPLC UV ( $\lambda = 220$  nm) trace (black) overlaid with the radio HPLC trace (red) of purified [ $^{18}\text{F}$ ]-4 spiked with purified [ $^{19}\text{F}$ ]-4 (y-axis: arbitrary scale).

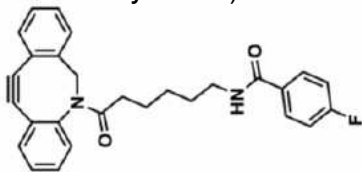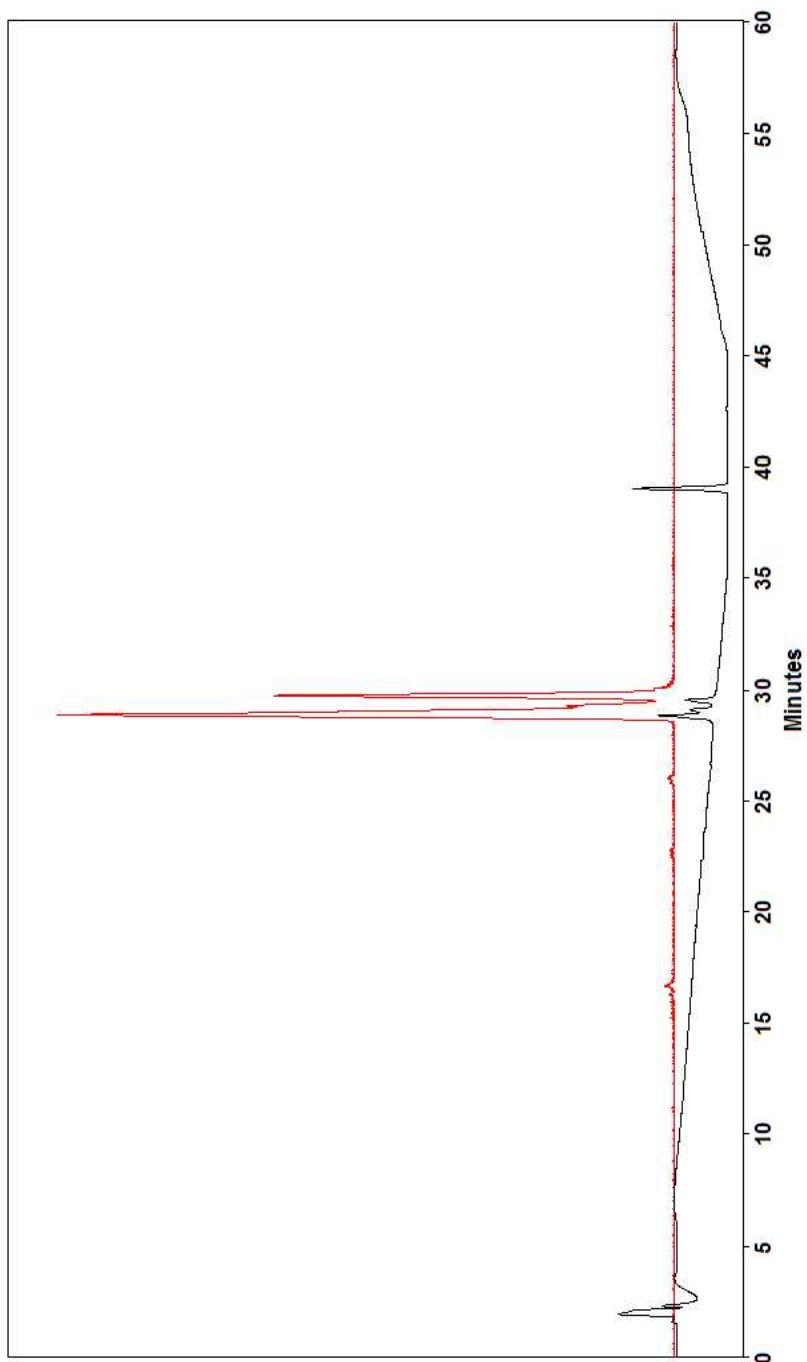

# Supporting Information Figure 5. LC/MS traces of [<sup>19</sup>F]-11.

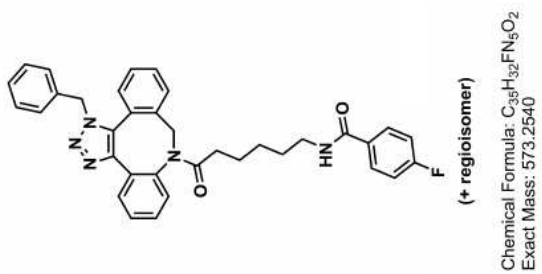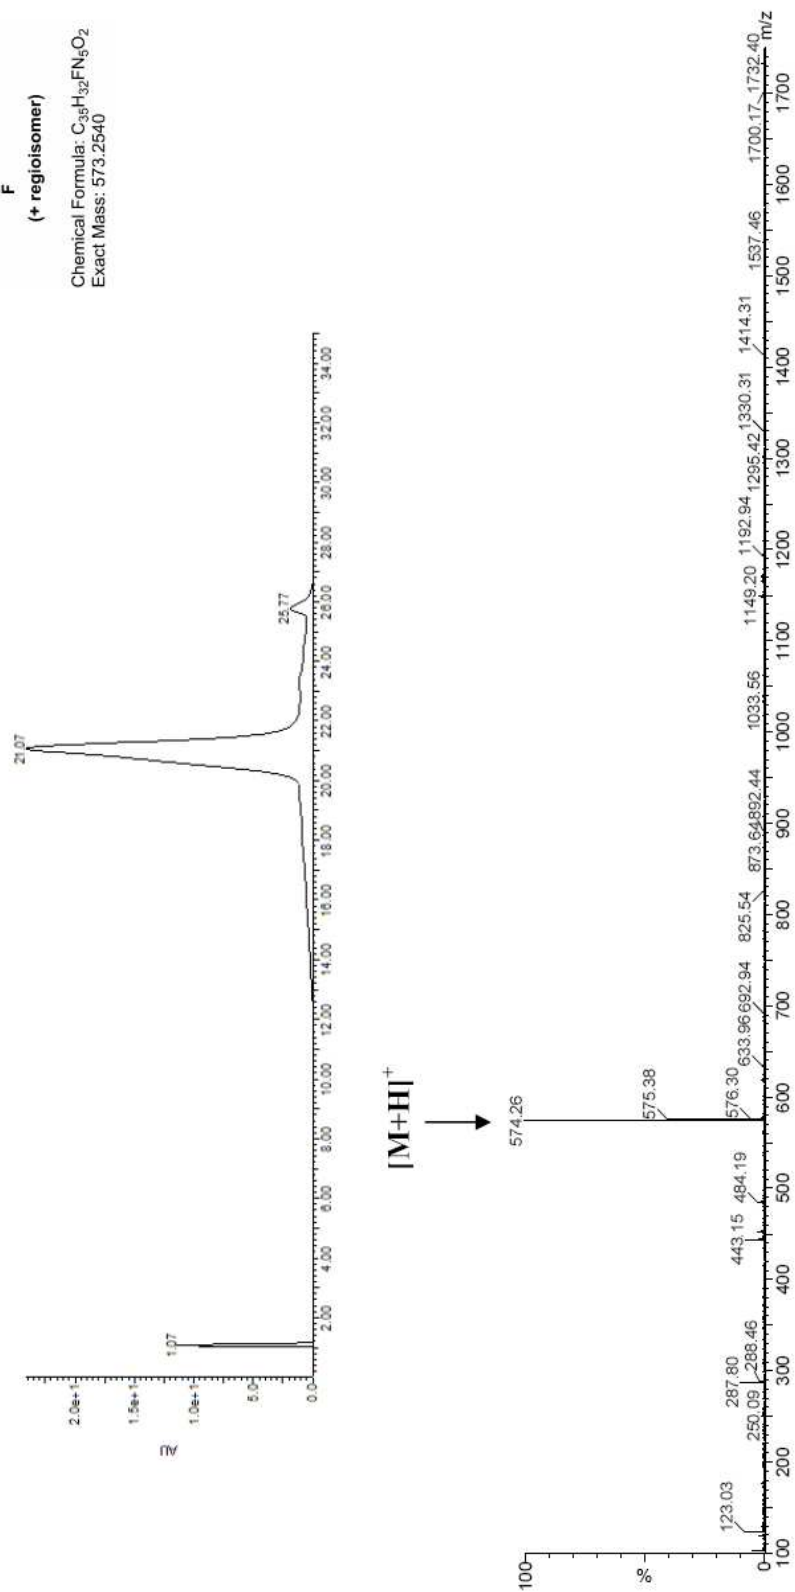

Supporting Information Figure 6. Analytical HPLC trace of [<sup>19</sup>F]-11 ( $\lambda = 220$  nm).

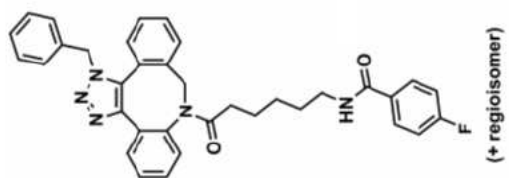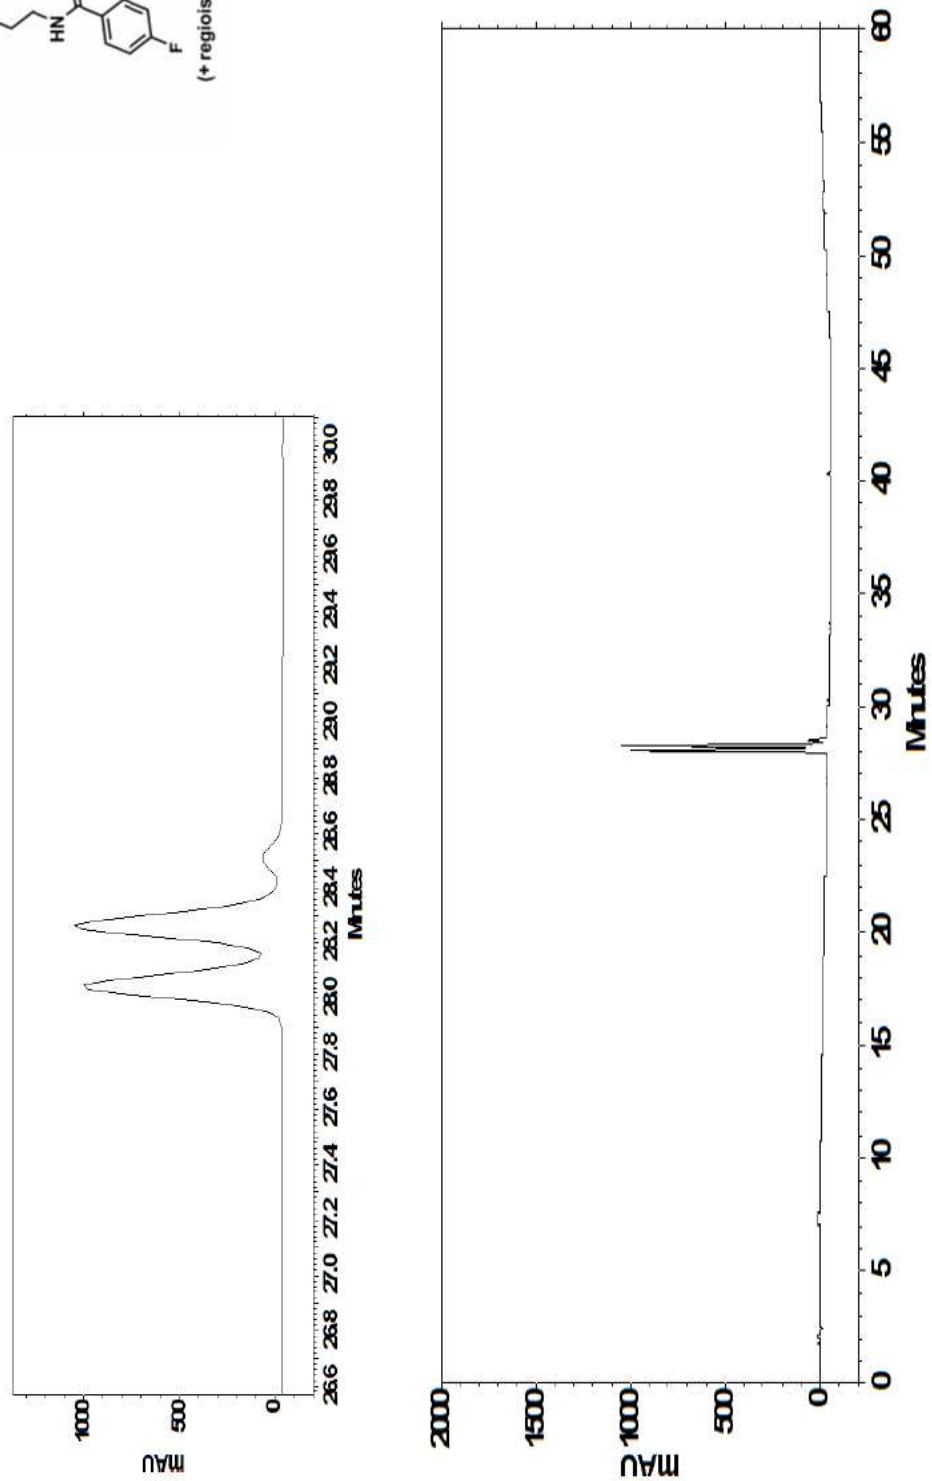



Supporting Information Figure 7. LC/MS traces of [<sup>19</sup>F]-12.

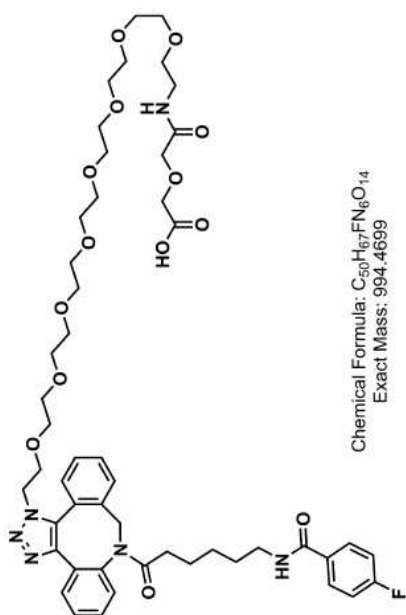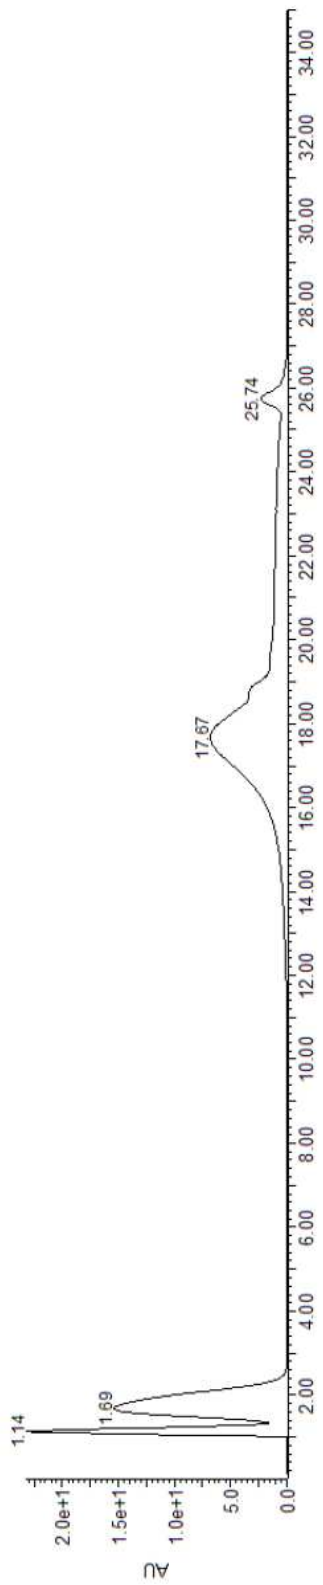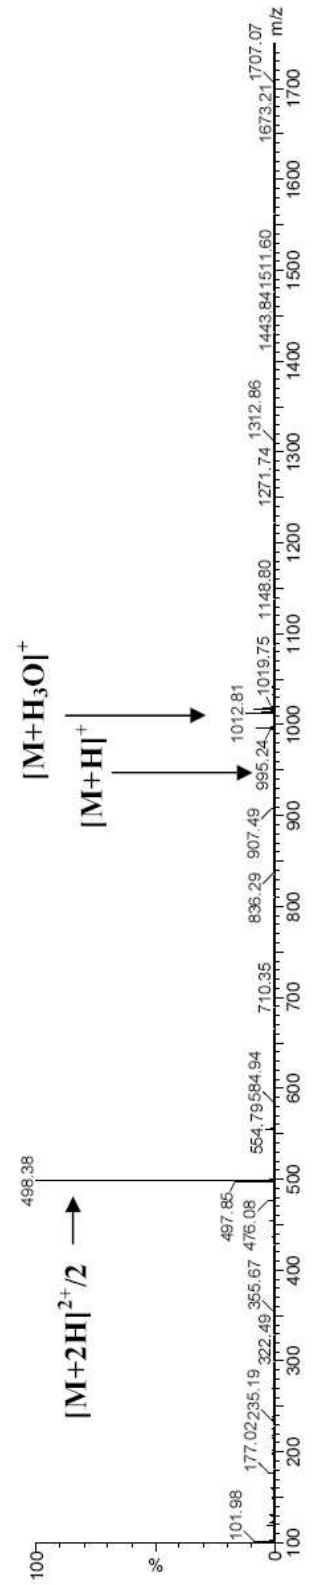



**Supporting Information Figure 9.** Analytical HPLC UV ( $\lambda = 220$  nm) trace (black) overlaid with the radio HPLC trace (red) of purified [ $^{18}\text{F}$ ]-11 (y-axis: arbitrary scale).

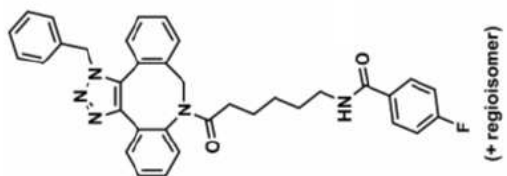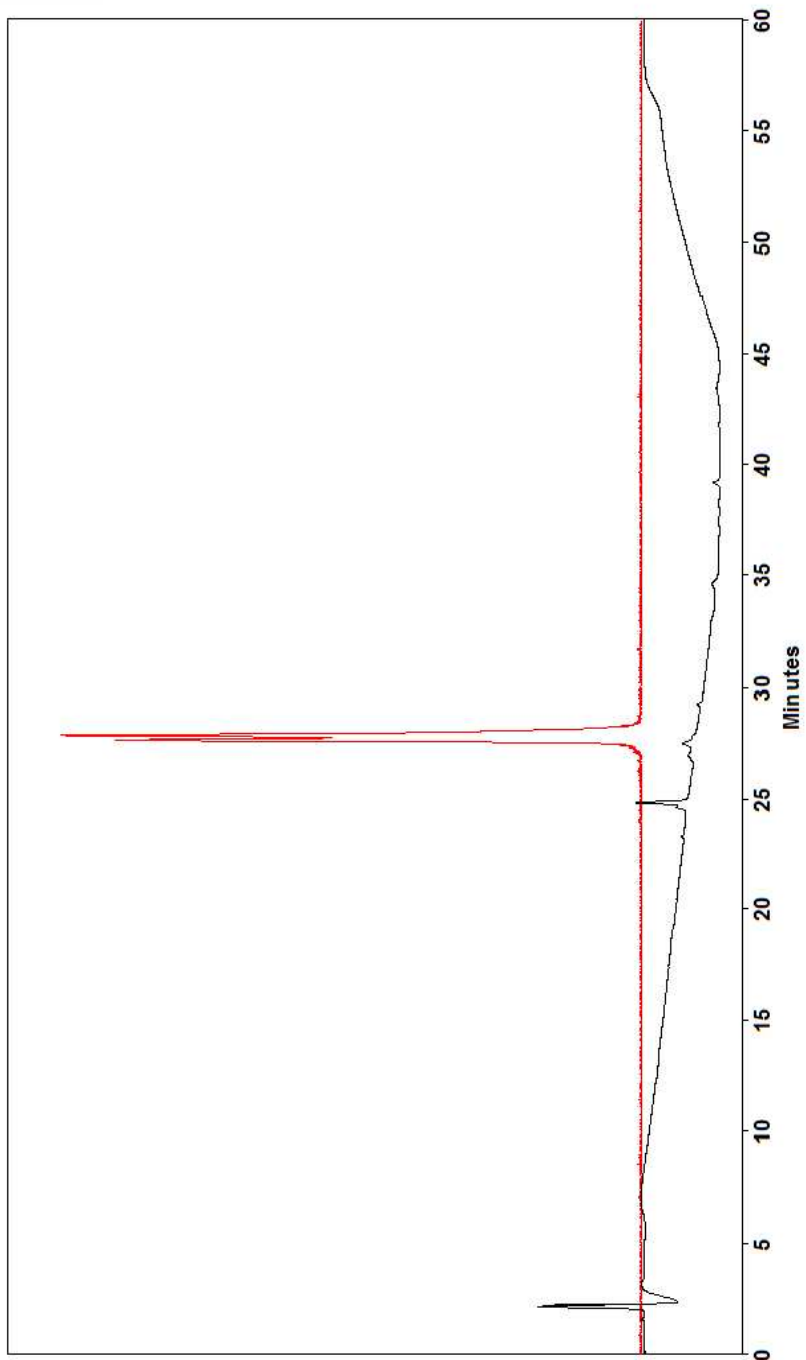

**Supporting Information Figure 10.** Analytical HPLC UV ( $\lambda = 220$  nm) trace (black) overlaid with the radio HPLC trace (red) of purified [ $^{18}\text{F}$ ]-11 spiked with purified [ $^{19}\text{F}$ ]-11 (y-axis: arbitrary scale).

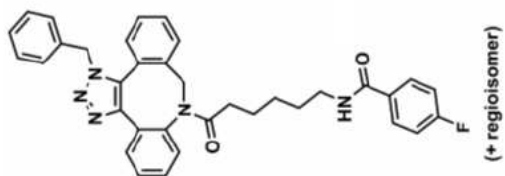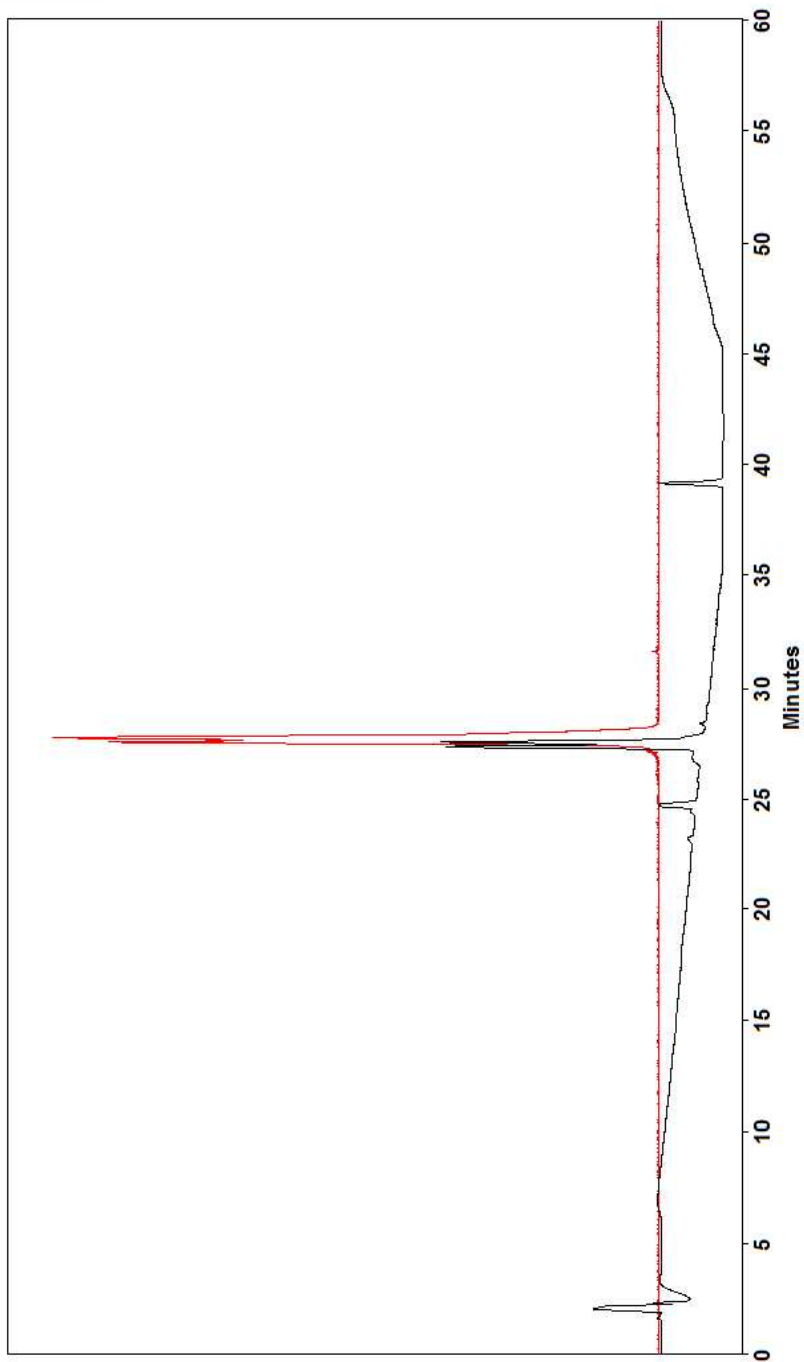

**Supporting Information Figure 11.** Analytical HPLC UV ( $\lambda = 220$  nm) trace (black) overlaid with the radio HPLC trace (red) of purified [ $^{18}\text{F}$ ]-**12** (y-axis: arbitrary scale).

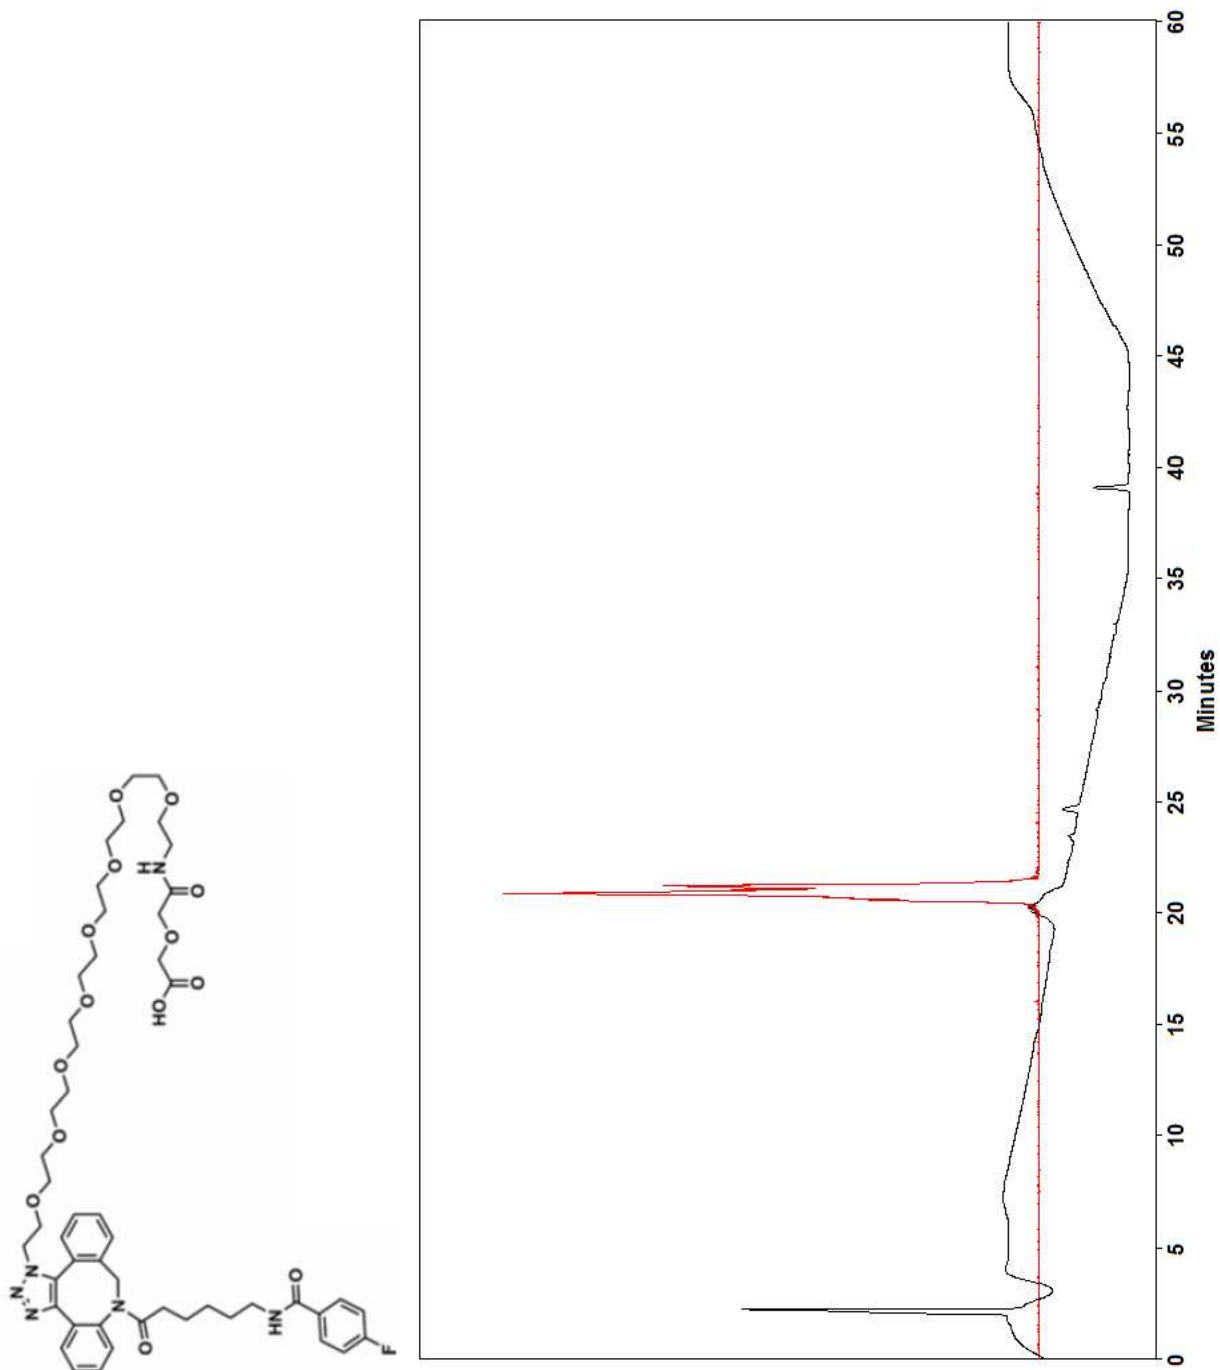

**Supporting Information Figure 12.** Analytical HPLC UV ( $\lambda = 220$  nm) trace (black) overlaid with the radio HPLC trace (red) of purified [ $^{18}\text{F}$ ]-12 spiked with purified [ $^{19}\text{F}$ ]-12 (y-axis: arbitrary scale).

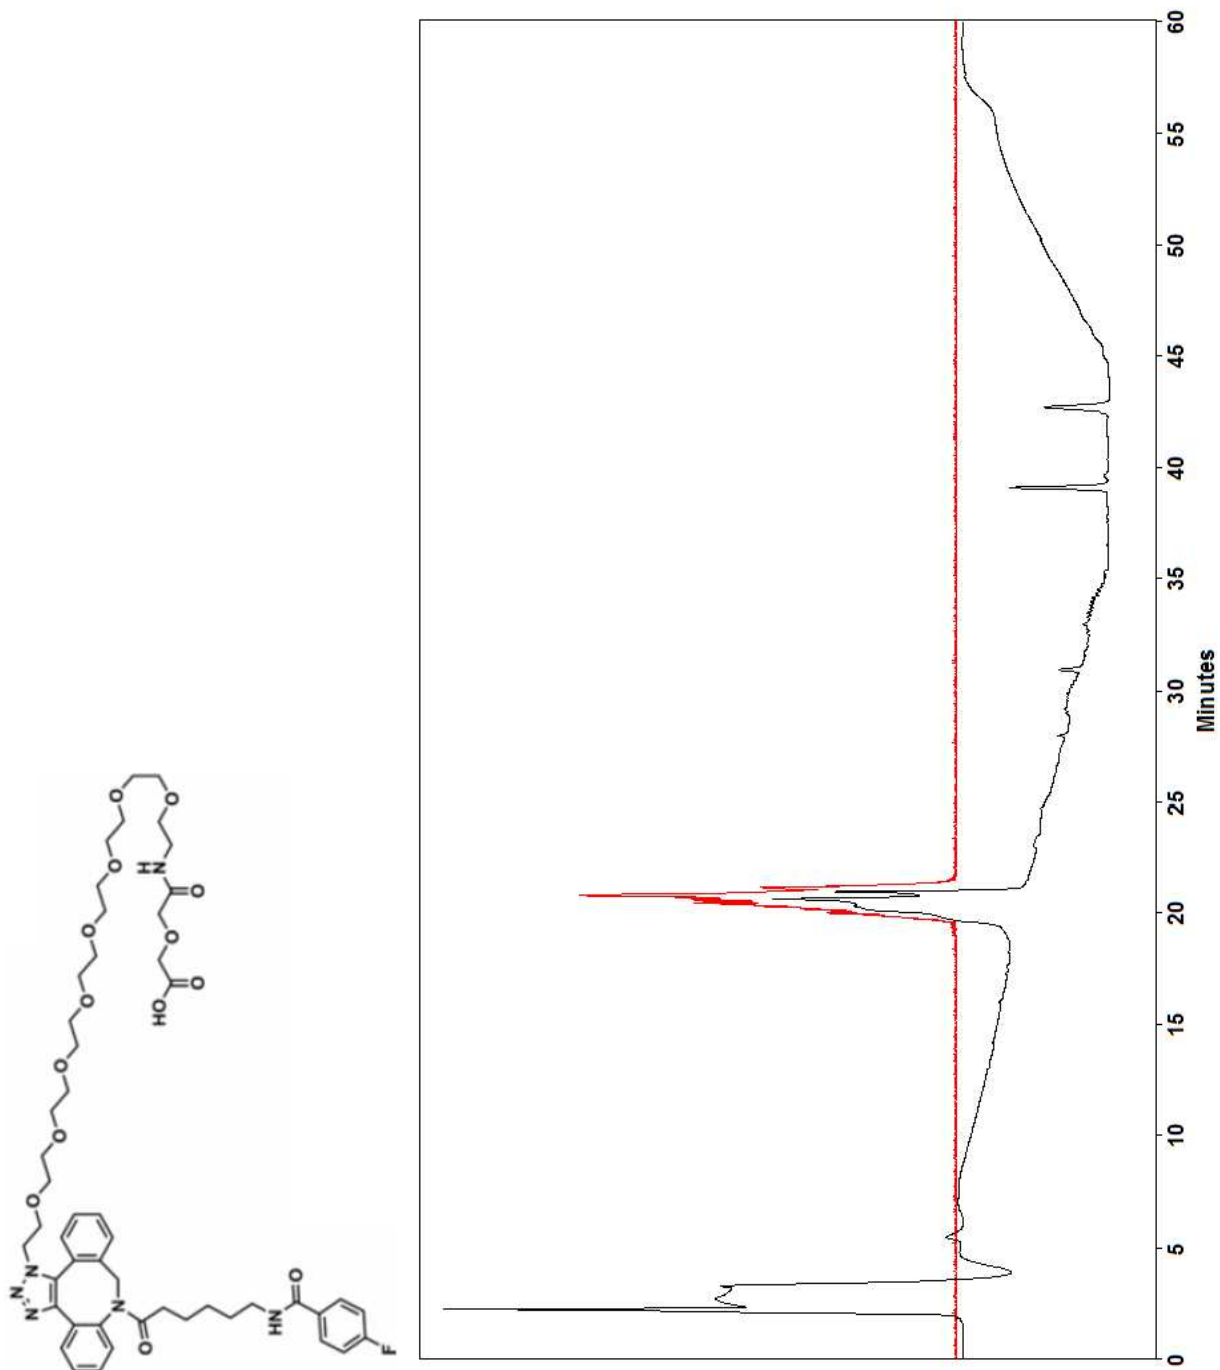

Supplement: ml200187j_si_001.pdf [file ml200187j_si_001.pdf]
